# Supplementary material for: Voltammetric Electrochemical Behavior of Carbon Paste Electrode Containing Intrinsic Silver for Determination of Cysteine
Source: MDPI journal article supplement (doi:10.3390/chemosensors10070240), 2022-06-24
Supplement: s1 [file s1]

# Voltammetric Electrochemical Behavior of Carbon Paste Electrode Containing Intrinsic Silver for Determination of Cysteine

Maša Buljac <sup>1,\*</sup>, Denis Krivić <sup>2</sup>, Ivana Škugor Rončević <sup>3</sup>, Nives Vladislavić <sup>3</sup> and Marijo Buzuk <sup>3</sup>

<sup>1</sup> Department of Environmental Chemistry, Faculty of Chemistry and Technology, University of Split, 21000 Split, Croatia

<sup>2</sup> Division of Biophysics, Gottfried Schatz Research Center, Medical University of Graz, 8010 Graz, Austria; denis.krivic@medunigraz.at

<sup>3</sup> Department of General and Inorganic Chemistry, Faculty of Chemistry and Technology, University of Split, 21000 Split, Croatia; skugor@ktf-split.hr (I.Š.R.); nives@ktf-split.hr (N.V.); buzuk@ktf-split.hr (M.B.)

\* Correspondence: masa@ktf-split.hr; Tel.: +385-21-329-479

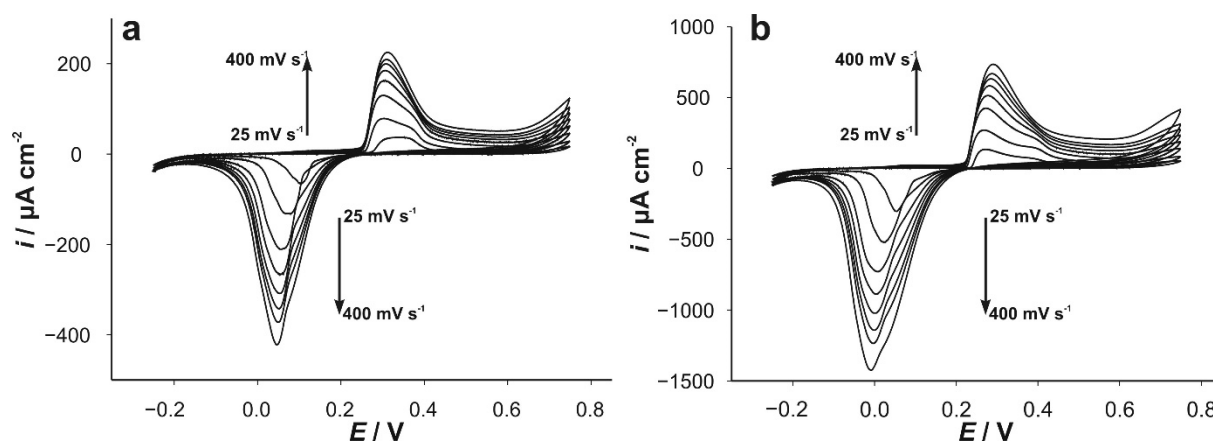

**Figure S1.** Cyclic voltammograms recorded in 0.1 M acetate buffer solution at pH 5 with the CPEs modified with (a) 2.5 % and (b) 5% of the material, at different scan rates: 25, 50, 100, 150, 200, 250, 300 and 400  $\text{mV s}^{-1}$ .

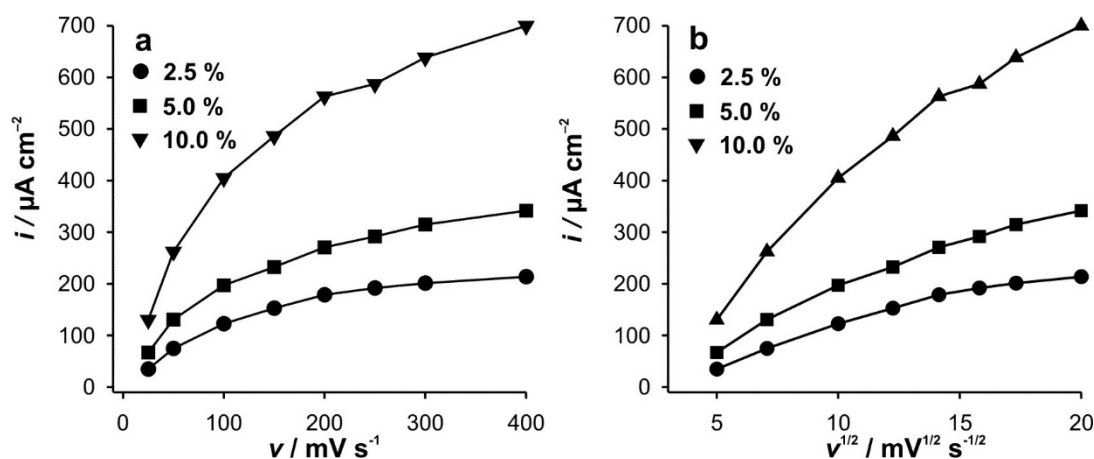

**Figure S2.** Dependences of the oxidative peak currents, for the CPEs modified with different amount of materials upon: (a) scan rate; (b) square root of scan rate. Cyclic voltammograms were recorded in 0.1 M acetate buffer solution at pH 5.

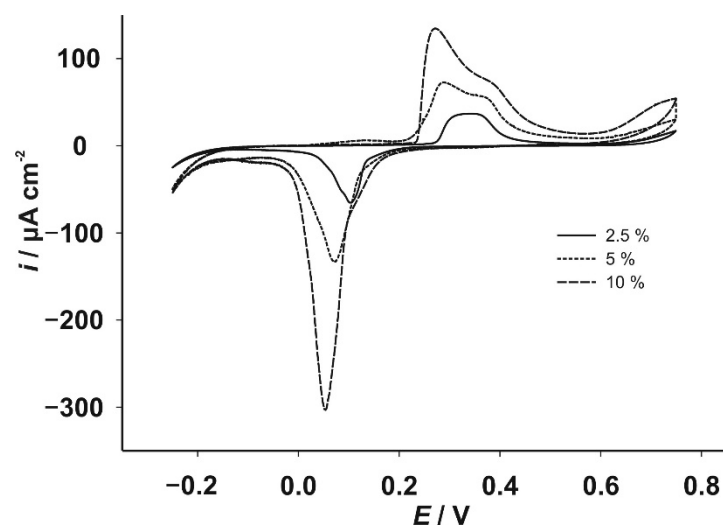

**Figure S3.** Cyclic voltammograms recorded with CPE, modified with different amount of the material in acetate buffer solution at pH 5, at scan rate of  $25 \text{ mV s}^{-1}$ .
